# Supplementary material
Source: MDPI journal article supplement (https://www.mdpi.com/2571-9408/2/4/172)
Supplement: s1 [file s1]

# SUPPLEMENTARIES

Table S1: Presentation of the remains background

|         | Constructor     | Aircraft<br>Type                                               | Dating             |                      | Excavation site                                         | Causes of the<br>crash                                              | Parts<br>constituting<br>the remains            |
|---------|-----------------|----------------------------------------------------------------|--------------------|----------------------|---------------------------------------------------------|---------------------------------------------------------------------|-------------------------------------------------|
|         |                 |                                                                | Production<br>date | Date of the<br>crash |                                                         |                                                                     |                                                 |
| Germany | Dornier         | Do 217 n°<br>4749<br><br>type K3                               | 1943               | 15/06/1944           | In the Pyrénées<br>Moutains<br>nearby Saint-<br>Gaudens | Crash in the<br>mountain                                            | 2 Stringers, 4<br>plates,<br>numerous<br>rivets |
|         | Focke-Wulf      | FW 190<br><br>Type A                                           | 1940               | 06-26-1943           | Toulouse<br>Blagnac                                     | Collision with<br>another FW190                                     | 2 stringers, 2<br>plates,<br>numerous<br>rivets |
|         | Heinkel         | He 111 n°<br>2214<br><br>Type B                                | July 1937          | 25-01-1939           | South of Tarbes                                         | Crashed into<br>the Pyrénées<br>Mountains                           | 1 stringer, 2<br>plates,<br>numerous<br>rivets  |
|         |                 | He 111 H-<br>111<br>n°110070,<br>registration<br>mark<br>GL+ET | April 1943         | 11-10-1943           | Near Albi                                               | Fire in the left<br>engine, loss of<br>control                      | 1 plate, few<br>rivets                          |
|         | Messerschmitt   | Bf 109<br>n°5145<br><br>Type E7                                | 1940               | 11-11-1943           | Pyrénées                                                | Training session                                                    | 4 plates,<br>numerous<br>rivets                 |
| France  | Dewoitine       | D.520<br>n°531                                                 | 1940               | 08-25-1944           | Encausse les<br>thermes near<br>Saint Gaudens           | Hit the ground<br>at high speed                                     | 5 plates,<br>numerous<br>rivets                 |
|         |                 | D.338<br>110070<br>registration<br>mark F-<br>AQBB             | 1937               | 03-23-1938           | Pyrénées                                                | Hit a mountain<br>(Sainte-Croix<br>peak)                            | 1 plates, few<br>rivets                         |
|         | Lioré & Olivier | Léo 45                                                         | 1939               | 06-19-1940           | Nearby<br>Carcassonne                                   | Bad weather,<br>caught in a<br>storm, lost a<br>wing and<br>crashed | 5 plates,<br>numerous<br>rivets                 |
|         | Latécoère       | Latécoère<br>298                                               | February 1940      | 06-19-1940           | Nearby<br>Montségur-                                    | Bad weather<br>and                                                  | 1 stringer, 2<br>plates,                        |

|    |                         |                                                      |      |            |                                      |                                           |                                              |
|----|-------------------------|------------------------------------------------------|------|------------|--------------------------------------|-------------------------------------------|----------------------------------------------|
|    |                         | n°93                                                 |      |            | Pyrénées Mountains                   | unexperienced pilot                       | numerous rivets                              |
|    |                         | Latécoère 17 n°622<br>License plate F-AIGL           | 1927 | 08-01-1927 | Nearby Saint-Gaudens                 | Bad weather                               | 3 plates, few rivets                         |
| UK | Avro                    | Lancaster                                            | 1943 | 04-06-1944 | Toulouse-Montaudran                  | Explosion                                 | 3 plates, 2 stringers, few rivets            |
|    | De Havilland            | Mosquito                                             | 1943 | 08-12-1944 | Pujaudran at the Gers border         | Shot down by mistake by a Mustang P-51    | 1 stringer, 1 cast alloy, 1 wire, few rivets |
| US | North American Aviation | Mustang P51 D A9A                                    | 1943 | 08-09-1944 | Plouigneau (Brittany)                | Lost its coolant and crashed              | 2 plates, 1 wire                             |
|    |                         | Mustang P51 A                                        | 1943 | 08-06-1943 | Morlaix                              | Hit electric wires and crashed            | 3 plates, few rivets                         |
|    | Lockheed                | P38 Lightning<br>F-5B-1-LO<br>LAC 2734<br>n°42-68223 | 1943 | 07-31-1944 | In sea- Riou Island nearby Marseille | Saint-Exupéry crashed with this airplane. | 2 plates, 1 stringer, few rivets             |

Figure S1:

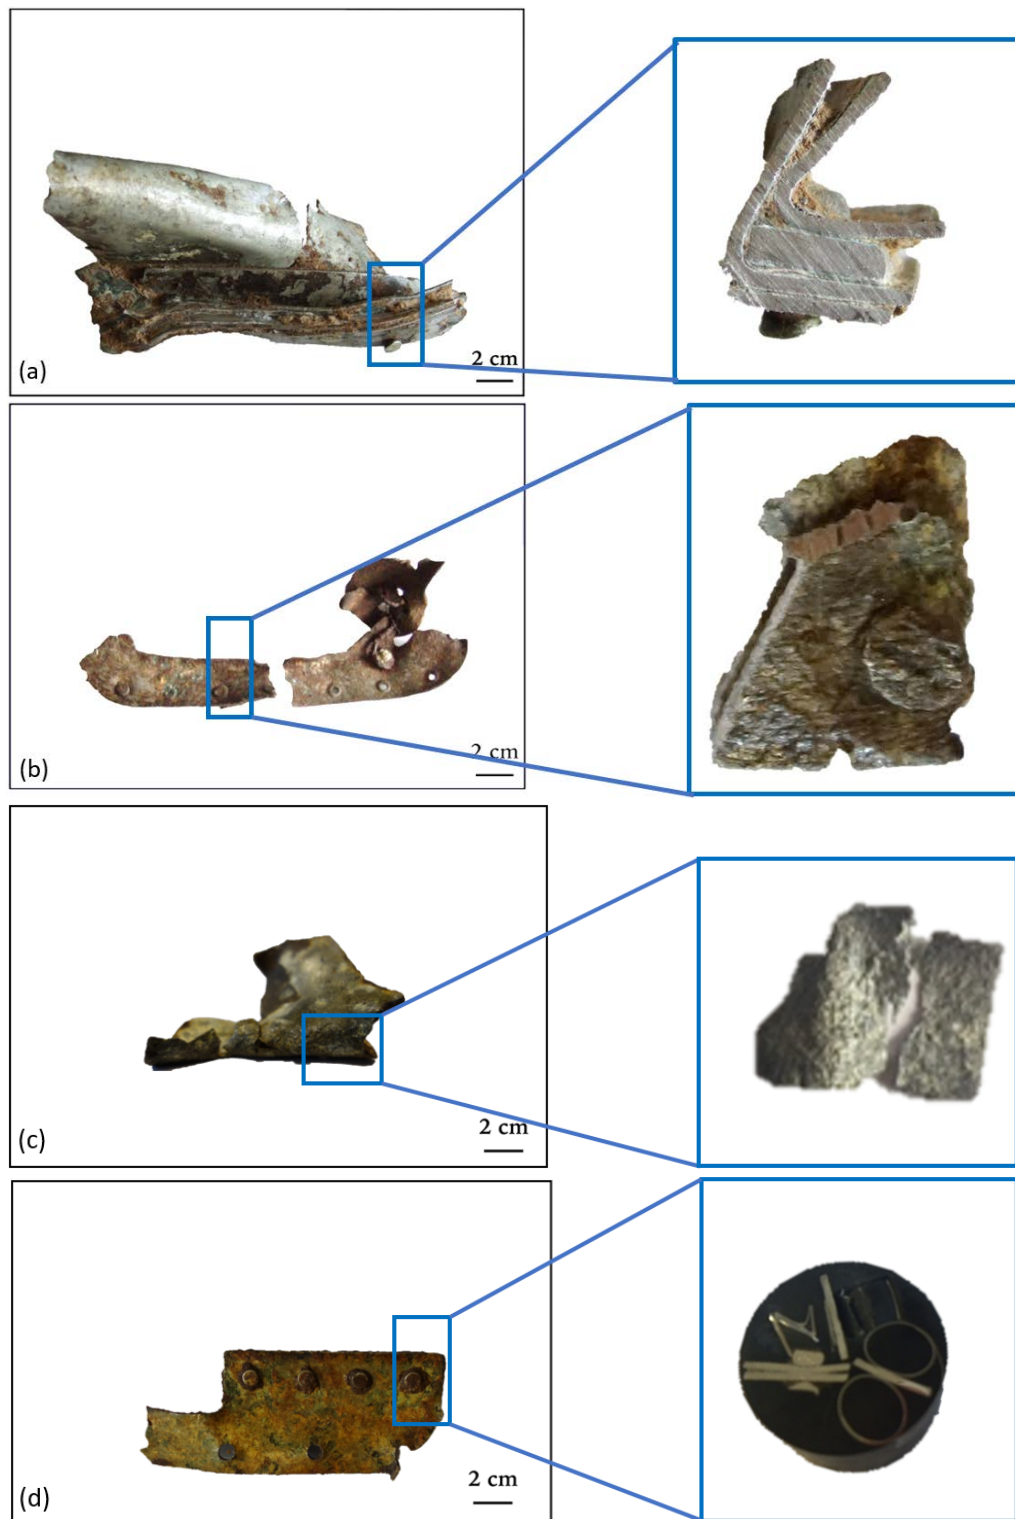

*Figure 1 : Figure revealing the studied parts composition. (a) The Bf 109 sample contains 4 plates and 1 rivet; (b) the D.520 sample is composed of 2 plates and 1 rivet; (c) the Lancaster sample consists in 1 plate and (d) the Mustang P-51 sample is composed of 2 plates and 1 rivet.*

The collected parts are a bunch of plates as shown in Figure S1. The chemical analyses made on the plates from the same remain (see Table S2) revealed that the plates were made of the same alloy.

Table S2: Number of studied parts and their alloys identification

| Remains/ Analyzed part                       | Nature of the part | Thickness (mm) | Alloy                      |
|----------------------------------------------|--------------------|----------------|----------------------------|
| <b>Bf 109</b> (composed of 4 plates)         | Plate 1            | 0.5            | <b>AlCuMg1</b>             |
|                                              | Plate 2            | 1.5            |                            |
|                                              | Plate 3            | 3              |                            |
|                                              | Plate 4            | 1.4            |                            |
| <b>D.520 part1</b><br>(composed of 2 plates) | Plate 1            | 0.7            | <b>Duralumin</b>           |
|                                              | Plate 2            | 2.0            |                            |
| <b>D.520 part2</b>                           | Plate 1            | 1.0            |                            |
| <b>Lancaster</b>                             | Plate 1            | 1.5            | <b>Hiduminium DU Brand</b> |
| <b>P-51</b><br>(composed of two plates)      | Plate 1            | 1.0            | <b>24S</b>                 |
|                                              | Plate 2            | 1.0            |                            |
